# Supplementary material for: An unusual early-diverging plesiosauroid from the Lower Jurassic Posidonia Shale of Holzmaden, Germany
Source: PeerJ. 2025 Aug 4;13:e19665. doi: 10.7717/peerj.19665 (PMC12330822; doi:10.7717/peerj.19665)
Supplement: Supplemental Information 6 [file peerj-13-19665-s006.docx]

**Table 3.** Measurements (in mm) of the girdle elements of *Plesionectes longicollum* (SMNS 51945).

| | **Interclavicle** |  | | --- | --- | | Length anteroposterioly | 80.80 | | Width anteriorly | 71.70 | |  |  | | **Scapula (left)** |  | | Length of ventral plate | 93.40 | | Height of ventral plate at posterior end | 25.80 | | Height of anterior end of scapula | 33.60 | | Dorsal process. length along anterior edge | 77.70 | | Dorsal process. length at ventral base | 63.60 | | Dorsal process. length at dorsal end | 28.90 | | Dorsal process. height posteriorly | 48.70 | |  |  | | **Pubis (right)** |  | | Largest width | 104.50 | |  |  | | **Ischium (right)** |  | | Length laterally | 48.20 | | Width | 91.00 | |  |  | | **Ischium (left)** |  | | Length medially | 94.50 | |  |  | | **Ilium (left)** |  | | Height dorsoventrally | 90.70 | | Length anteroposteriorly at dorsal end | 42.60 | | Length anteroposteriorly at ventral end | 33.20 | |  |  | | **Ilium (right)** |  | | Length anteroposteriorly at dorsal end | 47.50 | |
| --- | --- | --- | --- | --- | --- | --- | --- | --- | --- | --- | --- | --- | --- | --- | --- | --- | --- | --- | --- | --- | --- | --- | --- | --- | --- | --- | --- | --- | --- | --- | --- | --- | --- | --- | --- | --- | --- | --- | --- | --- | --- | --- | --- | --- | --- | --- | --- | --- | --- | --- | --- | --- | --- | --- | --- | --- | --- | --- | --- | --- |
